# Supplementary material for: Knowledge and Prevalence of Risk Factors for Coronary Artery Disease in Patients after Percutaneous Coronary Intervention and Coronary Artery Bypass Grafting
Source: MDPI journal article supplement (doi:10.3390/healthcare10061142), 2022-06-20

# Ocena stanu wiedzy oraz kontroli czynników ryzyka rozwoju miażdżycy wśród pacjentów po pierwszorazowej oraz kolejnej rewaskularyzacji naczyń wieńcowych

## PODSTAWOWE DANE PACJENTA

### 1. Płeć

*Zaznacz tylko jedną odpowiedź.*

- ☐ kobieta
- ☐ mężczyzna

### 2. Data urodzenia

*Przykład: 15 grudnia 2012*

### 3. Wzrost [cm]

.....

### 4. Waga [kg]

.....

### 5. Obwód pasa [cm]

### 6. Obwód bioder [cm]

### 7. Miejsce zamieszkania

*Zaznacz tylko jedną odpowiedź.*

- ☐ wieś
- ☐ miasto do 50 tys. mieszkańców
- ☐ miasto 50 - 100 tys. mieszkańców
- ☐ miasto powyżej 100 tys. mieszkańców

**8. Wykształcenie**

*Zaznacz tylko jedną odpowiedź.*

- ☐ podstawowe
- ☐ zasadnicze zawodowe
- ☐ średnie
- ☐ wyższe- licencjat, inżynier
- ☐ wyższe- magister
- ☐ podyplomowe

**9. Aktywność zawodowa**

*Zaznacz tylko jedną odpowiedź.*

- ☐ aktywny zawodowo - praca fizyczna
- ☐ aktywny zawodowo - praca umysłowa
- ☐ uczeń
- ☐ emeryt - dawniej praca fizyczna
- ☐ emeryt - dawniej praca umysłowa
- ☐ rencista
- ☐ bezrobotny

**10. Stan cywilny**

*Zaznacz tylko jedną odpowiedź.*

- ☐ zamężna / żonaty
- ☐ panna / kawaler
- ☐ rozwódka/ rozwodnik
- ☐ wdowa / wdowiec

**11. Ile osób wchodzi w skład Państwa gospodarstwa domowego?**

.....

**12. W którym z poniższych przedziałów mieszczą się miesięczne dochody brutto Państwa gospodarstwa domowego?**

*Zaznacz tylko jedną odpowiedź.*

- ☐ poniżej 2500 zł
- ☐ 2500 - 4000 zł
- ☐ 4000 - 6000 zł
- ☐ powyżej 6000 zł

**13. Uzyskiwane dochody określiłaby Pani/Pan jako:**

*Zaznacz tylko jedną odpowiedź.*

- ☐ Niskie, niewystarczające
- ☐ Odpowiednie, wystarczające
- ☐ Wysokie



20. Z jakich źródeł czerpie Pani/Pan wiedzę na temat tego, w jaki sposób żyć po zawale serca?

Zaznacz wszystkie właściwe odpowiedzi.

- ☐ uczestnictwo w Klubie Pacjenta/ Szkole Serca
- ☐ od lekarza pierwszego kontaktu
- ☐ od lekarza kardiologa
- ☐ od rodziny, znajomych
- ☐ z TV
- ☐ z książek, prasy, broszur informacyjnych
- ☐ z internetu
- ☐ nie szukam informacji na ten temat
- ☐ Inne: .....

21. Proszę określić w jakim stopniu wymienione czynniki wpływają na zachorowanie na chorobę wieńcową

Zaznacz tylko jedną odpowiedź w rzędzie.

|                                              | Nie wpływa            | Wpływa                | Nie wiem              |
|----------------------------------------------|-----------------------|-----------------------|-----------------------|
| Nadciśnienie tętnicze                        | <input type="radio"/> | <input type="radio"/> | <input type="radio"/> |
| Cukrzyca                                     | <input type="radio"/> | <input type="radio"/> | <input type="radio"/> |
| Wysoki poziom cholesterolu                   | <input type="radio"/> | <input type="radio"/> | <input type="radio"/> |
| Palenie papierosów                           | <input type="radio"/> | <input type="radio"/> | <input type="radio"/> |
| Otyłość                                      | <input type="radio"/> | <input type="radio"/> | <input type="radio"/> |
| Mała aktywność fizyczna, siedzący tryb życia | <input type="radio"/> | <input type="radio"/> | <input type="radio"/> |
| Dieta bogata w tłuszcze zwierzece            | <input type="radio"/> | <input type="radio"/> | <input type="radio"/> |
| Wiek                                         | <input type="radio"/> | <input type="radio"/> | <input type="radio"/> |
| Płeć                                         | <input type="radio"/> | <input type="radio"/> | <input type="radio"/> |
| Predyspozycje rodzinne                       | <input type="radio"/> | <input type="radio"/> | <input type="radio"/> |
| Niskie dochody, niskie wykształcenie         | <input type="radio"/> | <input type="radio"/> | <input type="radio"/> |
| Wysoki poziom stresu w życiu                 | <input type="radio"/> | <input type="radio"/> | <input type="radio"/> |
| Depresja, ograniczenie kontaktów społecznych | <input type="radio"/> | <input type="radio"/> | <input type="radio"/> |

22. Czy wyeliminowanie przynajmniej jednego czynnika ryzyka miażdżycy może mieć pozytywny wpływ na rozwój choroby wieńcowej?

Zaznacz tylko jedną odpowiedź.

- ☐ Tak, choć celem powinno być wyeliminowanie wszystkich (usunięcie jednego ułatwi eliminację kolejnych)
- ☐ Tak, wystarczy wyeliminować jeden, najgroźniejszy czynnik
- ☐ Nie, eliminacja pojedynczego czynnika ryzyka nie przekłada się na lepsze rokowanie
- ☐ Nie wiem

**23. Jakie działania należy podejmować, aby kontrolować podane czynniki ryzyka chorób serca i naczyń?**

*Zaznacz tylko jedną odpowiedź w rzędzie.*

|                                                   | Stosowanie leków      | Zdrowa dieta          | Regularne ćwiczenia fizyczne | Zaprzestanie palenia  | Żadne, nic nie można zrobić | Nie wiem              |
|---------------------------------------------------|-----------------------|-----------------------|------------------------------|-----------------------|-----------------------------|-----------------------|
| Nadciśnienie tętnicze                             | <input type="radio"/> | <input type="radio"/> | <input type="radio"/>        | <input type="radio"/> | <input type="radio"/>       | <input type="radio"/> |
| Cukrzyca                                          | <input type="radio"/> | <input type="radio"/> | <input type="radio"/>        | <input type="radio"/> | <input type="radio"/>       | <input type="radio"/> |
| Hipercholesterolemia                              | <input type="radio"/> | <input type="radio"/> | <input type="radio"/>        | <input type="radio"/> | <input type="radio"/>       | <input type="radio"/> |
| Utrzymanie lub osiągnięcie prawidłowej masy ciała | <input type="radio"/> | <input type="radio"/> | <input type="radio"/>        | <input type="radio"/> | <input type="radio"/>       | <input type="radio"/> |

## **CIŚNIENIE TĘTNICZE KRWI**

**24. Proszę określić jakich wartości ciśnienie tętnicze nie powinno przekraczać**

*Zaznacz tylko jedną odpowiedź.*

- ☐ 120/80
- ☐ 140/90
- ☐ Podczas aktywności / w stresie dopuszczalne jest ciśnienie powyżej 140/90
- ☐ Nie ma określonej granicy, prawidłowe ciśnienie to takie, przy którym pacjent czuje się dobrze
- ☐ Nie wiem

## **POZIOM GLUKOZY WE KRWI**

**25. Proszę podać prawidłowy poziom glukozy we krwi na czczo:**

*Zaznacz tylko jedną odpowiedź.*

- ☐ 50 - 70 mg% (2,8 – 2,9 mmol/l)
- ☐ 70 - 99 mg% (3,9 - 5,5 mmol/l)
- ☐ 100 - 125 mg% (5,6 - 6,9 mmol/l)
- ☐ 126 - 150 mg% (7,0 – 8,3 mmol/l)
- ☐ nie wiem

## **POZIOM CHOLESTEROLU WE KRWI**

**26. Na który parametr w lipidogramie należy zwrócić największą uwagę, ponieważ ma on największe znaczenie w powstawaniu miażdżycy?**

*Zaznacz tylko jedną odpowiedź.*

- ☐ Cholesterol LDL
- ☐ Cholesterol HDL
- ☐ Trójglicerdy
- ☐ nie wiem

## MASA CIAŁA

---

**27. Które z określeń najlepiej pasuje do Pani/Pana obecnej masy ciała?**

*Zaznacz tylko jedną odpowiedź.*

- ☐ Niedowaga
- ☐ Waga prawidłowa
- ☐ Nadwaga
- ☐ Otyłość
- ☐ Skrajna otyłość

**28. Jaka jest Pani/Pana zdaniem główna przyczyna Pani/Pana zbyt wysokiej wagi?**

*Zaznacz wszystkie właściwe odpowiedzi.*

- ☐ nie cierpię na nadwagę/otyłość
- ☐ wrodzona skłonność
- ☐ stres
- ☐ zbyt mała aktywność fizyczna
- ☐ nieodpowiednia dieta
- ☐ skutek uboczny stosowanych leków
- ☐ nie wiem

## STYL ŻYCIA

---

**29. Jaki Pani/Pana zdaniem wpływ stylu życia na ryzyko wystąpienia choroby niedokrwiennej serca ?**

*Zaznacz tylko jedną odpowiedź.*

- ☐ żaden
- ☐ mały
- ☐ duży
- ☐ nie wiem

**30. Po jakim czasie u chorych po zawale serca dąży się do powrotu do normalnego trybu życia?**

*Zaznacz tylko jedną odpowiedź.*

- ☐ Od razu po wyjściu ze szpitala - jeśli zabieg na naczyniach wieńcowych się udał to jestem zdrowy
- ☐ po 6-8 tygodniach
- ☐ po 6 miesiącach
- ☐ Powrót do normalnego trybu życia nie jest już nigdy możliwy
- ☐ nie wiem

## UŻYWKI

---

**31. Czy Pani/Pana zdaniem zaprzestanie palenia ma wpływ na ograniczenie negatywnych skutków choroby wieńcowej, która zdążyła się już ujawnić?**

*Zaznacz tylko jedną odpowiedź.*

- ☐ Tak
- ☐ Nie
- ☐ Nie wiem

**32. Czy u chorych na chorobę niedokrwienną serca dopuszczalne jest spożycie napojów alkoholowych?**

*\*10g alkoholu = 275ml piwa 5% = 100ml wina 13% = 30ml wódki 40%*

*Zaznacz wszystkie właściwe odpowiedzi.*

- ☐ Zdecydowanie nie, w żadnej ilości
- ☐ Mała ilość alkoholu (20g u mężczyzn, 10g u kobiet dziennie) jest dozwolona
- ☐ Alkohol - nawet w dużych ilościach - nie ma wpływu na serce
- ☐ Nie wiem

## DIETA

---

**33. Proszę wskazać jakie produkty należy spożywać a jakich należy unikać po zawale serca.**

*Zaznacz tylko jedną odpowiedź w rzędzie.*

|                                                                                     | należy spożywać       | należy unikać         |
|-------------------------------------------------------------------------------------|-----------------------|-----------------------|
| sól kuchenna powyżej 5g (łyżeczka)                                                  | <input type="radio"/> | <input type="radio"/> |
| produkty zawierające duże ilości błonnika pokarmowego (np. pełnoziarniste pieczywo) | <input type="radio"/> | <input type="radio"/> |
| kwasy tłuszczowe pochodzenia zwierzęcego                                            | <input type="radio"/> | <input type="radio"/> |
| kwasy tłuszczowe pochodzenia roślinnego (np. olej)                                  | <input type="radio"/> | <input type="radio"/> |
| nienasycone kwasy tłuszczowe grupy trans (margaryna, produkty cukiernicze)          | <input type="radio"/> | <input type="radio"/> |
| owoce w ilości powyżej 200g dziennie                                                | <input type="radio"/> | <input type="radio"/> |
| ryby co najmniej 2 razy w tygodniu                                                  | <input type="radio"/> | <input type="radio"/> |
| tłuste ryby 1 raz w tygodniu                                                        | <input type="radio"/> | <input type="radio"/> |
| cukry proste (np. słodycze, miód)                                                   | <input type="radio"/> | <input type="radio"/> |
| warzywa w ilości powyżej 200g dziennie                                              | <input type="radio"/> | <input type="radio"/> |

## AKTYWNOŚĆ FIZYCZNA

---

34. **Co oznacza zalecana pacjentom z chorobą niedokrwienną serca umiarkowana aktywność fizyczna?**

*Zaznacz tylko jedną odpowiedź.*

- ☐ ćwiczenia o małej intensywności (30-45min dziennie), praktykowane regularnie (3-5 razy w tygodniu)
- ☐ ćwiczenia o dużej intensywności i długim czasie trwania, bo tylko takie mają wpływ na zdrowie
- ☐ żadne ćwiczenia nie są rekomendowane, bo stanowią niebezpieczeństwo dla chorego z chorobą wieńcową
- ☐ nie wiem

## KONTROLA CZYNNIKÓW RYZYKA

wypełnia pacjent

35. **Generalnie można powiedzieć, że stan Pani/Pana zdrowia jest:**

*Zaznacz tylko jedną odpowiedź.*

|            | 1                     | 2                     | 3                     | 4                     | 5                     |              |
|------------|-----------------------|-----------------------|-----------------------|-----------------------|-----------------------|--------------|
| bardzo zły | <input type="radio"/> | bardzo dobry |

36. **W jakim stopniu choroba serca utrudnia Pani/Panu codzienne funkcjonowanie?**

*Zaznacz tylko jedną odpowiedź.*

|                    | 1                     | 2                     | 3                     | 4                     | 5                     |                                |
|--------------------|-----------------------|-----------------------|-----------------------|-----------------------|-----------------------|--------------------------------|
| Wcale nie utrudnia | <input type="radio"/> | Uniemożliwia mi funkcjonowanie |

37. **Jak ocenia Pani/Pan efektywność edukacji na temat życia z chorobą serca prowadzonej przez pracowników służby zdrowia?**

*Zaznacz tylko jedną odpowiedź.*

|                                   | 1                     | 2                     | 3                     | 4                     | 5                     |                                                                         |
|-----------------------------------|-----------------------|-----------------------|-----------------------|-----------------------|-----------------------|-------------------------------------------------------------------------|
| bardzo źle,<br>edukacja nieobecna | <input type="radio"/> | bardzo dobrze, wyjaśniono mi<br>jak powinno się postępować po<br>zawale |

38. **W jakich formach rehabilitacji kardiologicznej Państwo uczestniczyli?**

*Zaznacz wszystkie właściwe odpowiedzi.*

- ☐ rehabilitacja w trybie stacjonarnym (oddział rehabilitacyjny, uzdrowisko)
- ☐ rehabilitacja w trybie ambulatoryjnym (poradnia rehabilitacji kardiologicznej, oddział dzienny rehabilitacji kardiologicznej)
- ☐ rehabilitacja w domu
- ☐ uczestnictwo w Klubie Pacjenta/ Szkole Serca
- ☐ nie brałem udziału w żadnej formie rehabilitacji



39. Czy zdarza się Pani/Panu zapomnieć o przyjęciu przepisanego na stałe leku?

Zaznacz tylko jedną odpowiedź.

- ☐ Nie, nigdy mi się nie zdarza
- ☐ Rzadziej niż raz w miesiącu
- ☐ Kilka razy w miesiącu lub częściej
- ☐ Zażywam przepisane leki tylko gdy mam dolegliwości

40. Jakie działania Pani/Pan podejmuje, aby kontrolować podane czynniki ryzyka chorób serca i naczyń?

Zaznacz tylko jedną odpowiedź w rzędzie.

|                                                   | Stosowanie leków      | Zdrowa dieta          | Regularne ćwiczenia fizyczne | Zaprzestanie palenia  | Nie podejmuję żadnych działań |
|---------------------------------------------------|-----------------------|-----------------------|------------------------------|-----------------------|-------------------------------|
| Nadciśnienie tętnicze                             | <input type="radio"/> | <input type="radio"/> | <input type="radio"/>        | <input type="radio"/> | <input type="radio"/>         |
| Cukrzyca                                          | <input type="radio"/> | <input type="radio"/> | <input type="radio"/>        | <input type="radio"/> | <input type="radio"/>         |
| Hipercholesterolemia                              | <input type="radio"/> | <input type="radio"/> | <input type="radio"/>        | <input type="radio"/> | <input type="radio"/>         |
| Utrzymanie lub osiągnięcie prawidłowej masy ciała | <input type="radio"/> | <input type="radio"/> | <input type="radio"/>        | <input type="radio"/> | <input type="radio"/>         |

41. Proszę wybrać, którego zalecenia dotyczącego zapobiegania chorobie wieńcowej jest Pani/Panu najtrudniej przestrzegać?

Zaznacz tylko jedną odpowiedź.

- ☐ Kontrola cukrzycy
- ☐ Kontrola ciśnienia tętniczego
- ☐ Utrzymanie diety niskokalorycznej i ubogotłuszczowej
- ☐ Kontrola masy ciała
- ☐ Całkowite zaprzestanie palenia
- ☐ Aktywność fizyczna 30-45 minut dziennie, 3-5 razy w tygodniu
- ☐ Przyjmowanie wszystkich zaleconych leków (podaj z jakiego powodu):
- ☐ Inne:

42. Proszę zaznaczyć, których zaleceń dotyczących zapobiegania chorobie wieńcowej nie udaje się Pani/Panu przestrzegać?

Zaznacz wszystkie właściwe odpowiedzi.

- ☐ Kontrola cukrzycy
- ☐ Kontrola ciśnienia tętniczego
- ☐ Utrzymanie diety niskokalorycznej i ubogotłuszczowej
- ☐ Kontrola masy ciała
- ☐ Całkowite zaprzestanie palenia
- ☐ Aktywność fizyczna 30-45 minut dziennie, 3-5 razy w tygodniu
- ☐ Przyjmowanie wszystkich zaleconych leków (podaj z jakiego powodu):
- ☐ Przestrzegam wszystkich zaleceń
- ☐ Inne:

## CIŚNIENIE TĘTNICZE

---

**43. Jak często dokonuje Pani/Pan pomiarów ciśnienia tętniczego?**

*Zaznacz tylko jedną odpowiedź.*

- ☐ Co najmniej 1 raz dziennie
- ☐ Raz w tygodniu
- ☐ Tylko przed wizytą kontrolną u lekarza
- ☐ Tylko w razie złego samopoczucia
- ☐ Nie mierze ciśnienia

**44. Jakie wartości ciśnienia skurczowego otrzymuje Pani/Pan zazwyczaj w trakcie domowych pomiarów w czasie spoczynku?**

Ciśnienie skurczowe- np. 120 w przypadku ciśnienia 120/80 ("większa wartość")

*Zaznacz tylko jedną odpowiedź.*

- ☐ Mniejsze niż 140
- ☐ 140-159
- ☐ 160-179
- ☐ powyżej 180
- ☐ Nie mierzę ciśnienia w domu

## DIETA

---

**45. Ile posiłków dziennie Pani/Pan spożywa?**

*Zaznacz tylko jedną odpowiedź.*

- ☐ mniej niż 3 posiłki dziennie
- ☐ 3 do 5 posiłków dziennie
- ☐ więcej niż 5 posiłków dziennie

## MASA CIAŁA

---

**46. Jeśli udało się Pani/Panu zredukować masę ciała, to którą metodę określiliby Państwo jako najbardziej pomocną?**

*Zaznacz tylko jedną odpowiedź.*

- ☐ nigdy nie podjąłem (-am) próby redukcji masy ciała ( w tym: bo nie mam nadwagi)
- ☐ wszystkie podjęte próby redukcji masy ciała były nieskuteczne
- ☐ zmiana nieprawidłowych nawyków żywieniowych
- ☐ zwiększenie aktywności fizycznej
- ☐ leczenie farmakologiczne
- ☐ leczenie dietetyczne
- ☐ psychoterapia
- ☐ leczenie chirurgiczne (operacja bariatryczna)
- ☐ Inne: .....

47. Proszę określić, ile razy podejmowali Państwo nieskuteczną próbę redukcji masy ciała.

## STYL ŻYCIA

---

48. Który z czynników miał największy wpływ na to jak wygląda Pani/Pana obecny styl życia?

*Zaznacz tylko jedną odpowiedź.*

- ☐ Wychowanie i wykształcenie
- ☐ Przeżyte choroby i inne trudne wydarzenia życiowe
- ☐ Status majątkowy
- ☐ Czynniki kulturowe, społeczeństwo w którym żyje
- ☐ Wykonywana praca
- ☐ Żadne z powyższych

## UŻYWKI

---

49. Jeśli udało się Pani/Panu rzucić palenie, to którą metodę określiliby Państwo jako najbardziej pomocną?

*Zaznacz tylko jedną odpowiedź.*

- ☐ Nigdy nie podjąłem (-am) próby rzucenia palenia [w tym: bo nigdy nie paliłem (-am)]
- ☐ Wszystkie podjęte próby rzucenia palenia były nieskuteczne
- ☐ Silna wola, mocne postanowienie
- ☐ Metody farmakologiczne (nikotynowa terapia zastępcza, inne)
- ☐ Indywidualna lub grupowa terapia psychologiczna
- ☐ inne:

50. Proszę określić, ile razy podejmowali Państwo nieskuteczną próbę rzucenia palenia?

.....

## DIETA

---

51. Proszę wybrać ile dziennie porcji następujących produktów Pani/Pan zazwyczaj spożywa  
Zaznacz tylko jedną odpowiedź w rzędzie.

|                                                                                    | maksymalnie 1 porcja<br>dziennie | 2-3                   | 4-5                   | 6 i więcej porcji<br>dziennie |
|------------------------------------------------------------------------------------|----------------------------------|-----------------------|-----------------------|-------------------------------|
| Produkty zbożowe (np. 1 kromka chleba, 1/2 szklanki płatków )                      | <input type="radio"/>            | <input type="radio"/> | <input type="radio"/> | <input type="radio"/>         |
| Nisko tłuszczowe produkty mleczne (np. 1 szklanka mleka/jogurtu, 45g sera białego) | <input type="radio"/>            | <input type="radio"/> | <input type="radio"/> | <input type="radio"/>         |
| Mięso, ryby, drób (np. 100g wędliny, kotlet schabowy)                              | <input type="radio"/>            | <input type="radio"/> | <input type="radio"/> | <input type="radio"/>         |
| Owoce (np. 1 jabłko/banan, szklanka soku owocowego)                                | <input type="radio"/>            | <input type="radio"/> | <input type="radio"/> | <input type="radio"/>         |
| Warzywa (np. 1 pomidor, szklanka soku warzywnego)                                  | <input type="radio"/>            | <input type="radio"/> | <input type="radio"/> | <input type="radio"/>         |
| Orzechy, rośliny strączkowe (np. garść orzechów, 1/2 szklanki gotowanego grochu)   | <input type="radio"/>            | <input type="radio"/> | <input type="radio"/> | <input type="radio"/>         |
| Tłuszcze i oleje (np. 1 łyżeczka oleju/margaryny)                                  | <input type="radio"/>            | <input type="radio"/> | <input type="radio"/> | <input type="radio"/>         |
| Słodycze (np. 1 łyżeczka cukru, kostka czekolady)                                  | <input type="radio"/>            | <input type="radio"/> | <input type="radio"/> | <input type="radio"/>         |

## AKTYWNOŚĆ FIZYCZNA

52. Ile razy w tygodniu wykonuje Pani/Pan ćwiczenia fizyczne trwające około 30-45 minut?  
Zaznacz tylko jedną odpowiedź.

| 0                     | 1                     | 2                     | 3                     | 4                     | 5                     | 6                     | 7                     |
|-----------------------|-----------------------|-----------------------|-----------------------|-----------------------|-----------------------|-----------------------|-----------------------|
| <input type="radio"/> |

## CZYNNIKI PSYCHOSPOŁECZNE

53. Jak opisałby Pan/Pani poziom stresu w swoim życiu?  
Zaznacz tylko jedną odpowiedź.

|              | 1                     | 2                     | 3                     | 4                     | 5                     |                                               |
|--------------|-----------------------|-----------------------|-----------------------|-----------------------|-----------------------|-----------------------------------------------|
| bardzo niski | <input type="radio"/> | wysoki, utrudniający codzienne funkcjonowanie |

54. Jak ocenia Pani/Pan poziom własnej troski o zdrowie?  
Zaznacz tylko jedną odpowiedź.

|                             | 1                     | 2                     | 3                     | 4                     | 5                     |                               |
|-----------------------------|-----------------------|-----------------------|-----------------------|-----------------------|-----------------------|-------------------------------|
| Wcale się tym nie przejmuję | <input type="radio"/> | Wypełniam wszystkie zalecenia |

55. Kto pomaga Pani/Panu w przestrzeganiu zaleceń lekarza (podaje leki, dba o odpowiednią dietę)?

*Zaznacz tylko jedną odpowiedź.*

- ☐ sam się o to troszczę
- ☐ rodzina (współmałżonek, dzieci)
- ☐ opiekun medyczny lub pielęgniarka środowiskowa

56. Jaką formę edukacji na temat czynników ryzyka choroby wieńcowej chcieliby Państwo otrzymywać? (np. spotkania z lekarzami, broszury informacyjne i inne)

.....

---

Technologia

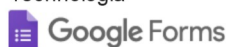

Supplement: s1 [file s1]
